# Supplementary material for: A measurement system for vertical seawater profiles close to the air–sea interface
Source: Copernicus journal article supplement (doi:10.5194/os-13-649-2017), 2017-09-04
Supplement: Supplementary file [file os-13-649-2017-supplement-title-page.pdf › os-13-649-2017-supplement-title-page.pdf]

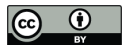

## *Supplement of*

# **A measurement system for vertical seawater profiles close to the air–sea interface**

**Richard P. Sims et al.**

*Correspondence to:* Thomas G. Bell (tbe@pml.ac.uk)

- os-13-649-2017-supplement-title-page.pdf
- NSOP paper\_20170622\_suppliment.pdf
- NSOP paper\_20170830\_data.xlsx
- Near surface ocean profiler deployment\_.mp4
- Near surface ocena profiler during sampling.mp4

The copyright of individual parts of the supplement might differ from the CC BY 3.0 License.
